# Supplementary material
Source: PubMed Central journal article supplement (PMC5074889)

## Supplemental Information

### Materials

Antibodies for RIP3 were purchased from ABGENT, San Diego, CA; pSer<sup>345</sup> MLKL (ab196436) and MLKL (ab172868) from Abcam, Cambridge, MA; TNF $\alpha$  (#70R-TR008) from Fitzgerald Industries International, Acton, MA; collagen 1 from Southern Biotech (Birmingham, AL); HSC70 and IRS-1 (sc-8038) from Santa Cruz Biotechnology (sc-7298), Dallas, TX; caspase-3 (#9665), PARP (#9544) and beta-actin(#4967) from Cell Signaling, Danvers, MA and pSer<sup>307</sup> IRS-1(44-813G) from Thermo Fisher Scientific, Grand Island, NY. Custom antibodies against 4-HNE modified proteins were from Alpha Diagnostics, San Antonio, TX. TUNEL assay kit (Apop Tag @ Plus in Situ apoptosis detection kit) was purchased from Millipore (Billerica, MA cat. no. S7111). Caspase-generated fragments of cytokeratin-18 were detected using M30 staining kit (Roche, Mannheim, Germany). MLKL<sup>-/-</sup> mice were from Taconic, Hudson, NY. MTS cytotoxicity kit CellTiter 96 AQueous One Solution Cell Proliferation Assay (Promega, Madison, WI; Cat# G3581). AML12 cells were from ATCC (Manassas, VA; cat#:CRL-2254). Cell culture media were from Sigma Aldrich (St. Louis, MO) and medium supplements were from Gibco ThermoFisher (Grand Island, NY) and Cayman Chemicals (Ann Arbor, MI). Propidium Iodide assays for live cell imaging were from Life Technologies (Eugene, OR).

### Methods

#### Mouse handling and tissue collection

Animals were housed in pairs in standard microisolator cages and maintained on a 12 h:12 h light/dark cycle. At the end of the HFD feeding protocol, mice were fasted for 6 hours prior to euthanasia. Mice were weighed weekly and food intake per cage measured weekly. Portions of

liver and epididymal adipose tissue were flash frozen in liquid nitrogen and stored at  $-80^{\circ}\text{C}$ , preserved in RNAlater (Ambion/Life Technologies) and stored at  $-20^{\circ}\text{C}$  until RNA isolation, or fixed in 10% formalin or frozen in optimal cutting temperature (OCT) compound (Sakura Finetek U.S.A., Inc., Torrance, CA) for histology. Blood was transferred to EDTA-containing tubes for the isolation of plasma. Plasma was then stored at  $-80^{\circ}\text{C}$ .

### **Energy Expenditure**

To measure energy expenditure, mice were fed the HFD or chow diets for 9 weeks and then transferred to the Columbus Instruments Comprehensive Lab Animal Monitoring System (Oxymax/CLAMS, Columbus Instruments, Inc). Food and water intake,  $\text{VO}_2$  and  $\text{VCO}_2$  were measured every 10 min for 168 h (1 wk). Respiratory exchange rate was calculated from  $\text{VO}_2$  and  $\text{VCO}_2$ . Subsequently, the mice were transferred to standard housing and were continued on the HFD or chow diets until they were used for glucose tolerance tests.

To account for body size variation on total energy expenditure (1), group comparisons involving this outcome were adjusted for total body mass using multiple-regression analysis as recommended by Kaiyala and colleagues (2, 3). The analysis of covariance (ANCOVA) was performed using the linear mixed model procedure (<http://www.mmpc.org/shared/regression.aspx>). Analyses were done within the photoperiod and encompassed four light and four dark cycles as repeated measures with a compound symmetry covariance structure. Differences were considered significant when  $P < 0.05$ , 2-tailed.

**Glucose tolerance tests.** Fasting blood glucose was measured from a tail nick using the OneTouch Ultra Blood Glucose Meter and test strips (Lifescan, Milpitas, CA). Glucose tolerance tests were performed on 6-h fasted mice after 14 weeks of high-fat diet feeding. For glucose tolerance tests, mice received 25% D-glucose solution (2 mg/kg of bodyweight) or an equal volume of saline by intraperitoneal injection; blood glucose was measured at baseline, 15, 30, 60, and 120 minutes. Fasting insulin was measured in plasma samples using a commercially available ELISA kit (Mercodia, Uppsala, Sweden). HOMA-IR was calculated using the following formula:  $(\text{fasting glucose (mg/dl)} \times \text{fasting insulin (ng/ml)})/405$ .

### **Biochemical assays**

Plasma samples were assayed for alanine aminotransferase (ALT) and aspartate aminotransferase (AST) using commercially available enzymatic assay kits (Sekisui America Corp, Secaucus, NJ) following the manufacturer's instructions. Total hepatic triglycerides were assayed using the Triglyceride Reagent Kit from Pointe Scientific Inc. (Lincoln Park, MI). Plasma cholesterol, beta-hydroxybutyrate, non-esterified fatty acids and triglycerides were measured by Marshfield Laboratories (Marshfield, WI).

### **Isolation of RNA and quantitative real-time polymerase chain reaction (qRT-PCR)**

Total RNA was isolated from liver tissue and reverse transcribed followed by amplification using qRT-PCR. 25  $\mu$ l of reaction mix contained cDNA, Power Syber Buffer (Applied Biosci/Life Technologies) and primers at final concentrations of 10  $\mu$ M. qRT-PCR was performed in the Mx3000P cycles of 15 s at 95 °C, 30 s at 60 °C, 30 s at 72 °C followed by 1 min at 95 °C, 30 s at 55 °C and 30 s at 95 °C. The relative amount of target mRNA was determined

using the comparative threshold (Ct) method by normalizing target mRNA Ct values to those of 18S (4). Primer sequences are listed in Supplemental Table 2.

### **PCR Array Analysis**

Total RNA was isolated from mouse liver using the RNeasy micro kit (Qiagen, USA) according to the manufacturer's instruction. Concentration and purity of isolated RNA were measured using the NanoDrop1000 spectrometer and samples were screened for an A260 : A280 ratio greater than 1.8. Conversion of RNA to cDNA was carried out using 50 ng of RNA according to the manufacturer's instructions for the RT<sup>2</sup> First Strand Synthesis Kit (Qiagen, USA). Samples were prepared from pooled RNA extracted from livers from 3 chow and 3 HFD mice.

The mouse insulin resistance (PAMM-156Z) focused pathway array (RT<sup>2</sup> Profiler<sup>TM</sup> PCR Array Mouse Insulin Resistance, Qiagen) in a 96 well plate format was used to assess changes in hepatic gene expression. The cDNA from individual samples was added to the reaction plates following the manufacturer's instructions using SYBR green and array analysis was performed using the Strata Gene Mx3000p system. Quality control tests for genomic DNA control, reverse transcription control and positive PCR control were included in each array plate. Data were analyzed using SABiosciences RT2 Profiler PCR Data Analysis software (available at <http://pcrdataanalysis.sabiosciences.com/mirna/arrayanalysis.php>) and were considered significant at >2.0-fold change. Three housekeeping genes not influenced by the experimental condition (*Hsp90ab1*, *Gapdh* and *Actb*) were used for normalization. Fold changes for each detectable gene are shown in Supplemental Table 1.

### **Western blot analysis**

Frozen liver was homogenized in lysis buffer (~50 mg tissue/ml). Protein concentrations were measured in lysates from liver and AML12 hepatocytes with the DC protein assay kit from Bio-Rad (Hercules, CA). Proteins were separated by SDS-PAGE for Western blot analysis. HSC70 was used as a loading control. Western blot analysis was performed using enhanced chemiluminescence for signal detection. Signal intensities were quantified by densitometry using Image J software (NIH, Bethesda, MD).

### **Culture and transfection of AML12 cells**

AML12 cells were cultured in DMEM/F12 with 10% FBS, supplemented with insulin, transferrin, selenium and dexamethasone, as per ATCC instructions. In some experiments, cells were pretreated with the pan-caspase inhibitor Z-VAD, necrostatin-1 (an inhibitor of RIP1 kinase), CA-074 (an inhibitor of cathepsin-B) or actinomycin D. In other experiments, in order to knock-down RIP3, cells were subcultured in 24-well plates at  $0.044 \times 10^6$ /ml/well or 96-well plates at  $0.007 \times 10^6$ /200ul/well. After 6 hrs, cells were transfected with scrambled siRNA or siRNA targeted against RIP3 (ON-TARGETplus SMARTpool siRNA cat# L-049919-00-0005; Target sequence: UCAAGAUCGUGAACUCGAA, CAAGUUCGGCCAAGUAUGA, GGUAAAGCAUUAUCUGUCU, and ACACGGCACUCCUUGGUAU, GE Healthcare Dharmacon, Lafayette CO) using Lipofectamine RNAiMAX Transfection Reagent (ThermoFisher Scientific, Cat# 13778150). After 24 h, media was changed and cells cultured with or without palmitic acid (prepared as a 50 mM stock) at 250-500 $\mu$ M for 14 h. Hepatocytes were then lysed for Western blot analysis or used to assess cytotoxicity utilizing the MTS assay.

For live cell imaging, AML12 cells were treated as above and then stained with propidium iodine and DAPI, according to the manufacturer's instructions.

## **Figure Legends**

### **Supplemental Figure 1: Liver pathology of C57BL/6 and RIP3<sup>-/-</sup> mice on high fat diets.**

Male C57BL/6 and RIP3-deficient mice (RIP3<sup>-/-</sup> neo) were allowed free access to high-fat diets (HFD) or chow diets for 12 weeks. **(A)** Hemotoxylin and eosin staining of mouse livers. Pathologist scoring of steatosis (% of hepatocytes with macro and/or microvesicular steatosis) was as follows: Wild-type chow  $0 \pm 0\%$ , wild-type HFD  $36 \pm 15\%$ , RIP3<sup>-/-</sup> chow  $0 \pm 0\%$  and RIP3<sup>-/-</sup>  $75 \pm 15\%$ . **(B)** Frozen liver sections were stained with oil red O. Images are representative of n=4-6 mice per group.

### **Supplemental Figure 2: Food intake, body weight gain and energy expenditure of C57BL/6 and RIP3<sup>-/-</sup> on high fat diets.**

**(A)** Food intake and body weight of male C57BL/6 and RIP3-deficient mice (Strain containing the neomycin cassette (RIP3<sup>-/-</sup> (neo))); **(B)** Food intake and body weight gain of male C57BL/6 and RIP3-deficient mice (with the neomycin cassette deleted (RIP3<sup>-/-</sup> CRE $\Delta$ )). **(C)** ANCOVA analysis of energy expenditure of C57BL/6 and RIP3<sup>-/-</sup> (neo) mice between week 10 and week 11 of HFD feeding. Indirect calorimetry was performed on mice fed either CHOW or HFD diet using Columbus Instruments Oxymax/CLAMS system. ANCOVA analysis was used because of the body weight difference between strains on HFD. To account for body size variation on total energy expenditure, group comparisons of energy expenditure (EE) and total body mass (TBM) were made using the linear mixed model, as described in methods. The interactions of EE and TBM were not significant for CHOW diet

( $P=0.6029$ ) or HFD ( $P=0.2246$ ), indicating that there were no differences in energy expenditure between C57BL/6 and RIP3<sup>-/-</sup> (neo) mice on either CHOW or HFD.

**Supplemental Figure 3: Co-localization of TUNEL and F4/80 in livers from C57BL/6 and**

**RIP3<sup>-/-</sup> mice on high fat diets.** Male C57BL/6 and RIP3-deficient mice (RIP3<sup>-/-</sup> neo) were allowed free access to high-fat diets (HFD) or chow diets for 12 weeks. Paraffin-embedded livers were de-paraffinized followed by TUNEL (Green) and F4/80 staining (Red). Merged images are shown in the right panel. Images were collected with a 40X objective and are representative of at least 5 animals per genotype.

**Supplemental Figure 4: siRNA knock-down of RIP3 protein expression in AML12 cells.**

AML12 cells were transfected with scrambled siRNA or siRNA directed against RIP3. 48 h after transfection, cells were fixed in formalin and RIP3 protein expression detected by immunohistochemistry. Green: RIP3 and Blue: DAPI.

**Supplemental Figure 5: Sirius red and collagen 1 in livers of C57BL/6 and RIP3<sup>-/-</sup> mice on**

**high fat diets.** Male C57BL/6 and RIP3-deficient mice (RIP3<sup>-/-</sup> neo) were allowed free access to high-fat diets (HFD) or chow diets for 12 weeks. **(A)** Liver sections were stained with Sirius red and imaged at 10X. **(B)** Frozen liver sections were used to immuno-detect collagen 1. Images were taken at 20X. Images are representative of 3 areas from 4-6 mice per group.

## References

1. Bouret SG, Gorski JN, Patterson CM, Chen S, Levin BE, Simerly RB. Hypothalamic neural projections are permanently disrupted in diet-induced obese rats. *Cell Metab* 2008;7:179-185.
2. Kaiyala KJ, Morton GJ, Leroux BG, Ogimoto K, Wisse B, Schwartz MW. Identification of body fat mass as a major determinant of metabolic rate in mice. *Diabetes* 2010;59:1657-1666.
3. Kaiyala KJ, Schwartz MW. Toward a more complete (and less controversial) understanding of energy expenditure and its role in obesity pathogenesis. *Diabetes* 2011;60:17-23.
4. Mandal P, Roychowdhury S, Park PH, Pratt BT, Roger T, Nagy LE. Adiponectin and heme oxygenase-1 suppress TLR4/MyD88-independent signaling in rat Kupffer cells and in mice after chronic ethanol exposure. *J Immunol*;185:4928-4937.



**Table 1: Fold changes in gene expression relative to C57BL/6 mice on chow diets: RT<sup>2</sup> Profiler<sup>TM</sup> PCR Array Mouse Insulin Resistance**

|         |                                                                          | Fold Change (comparing to WT Chow) |                    |                  |
|---------|--------------------------------------------------------------------------|------------------------------------|--------------------|------------------|
|         |                                                                          | WT HF Diet                         | RIPK3 KO Chow Diet | RIPK3 KO HF Diet |
| Symbol  | Description                                                              | Fold Change                        | Fold Change        | Fold Change      |
| Acaca   | Acetyl-Coenzyme A carboxylase alpha                                      | 2.0153                             | 1.4938             | 2.2799           |
| Acacb   | Acetyl-Coenzyme A carboxylase beta                                       | 1.7303                             | 1.2914             | 1.9986           |
| Acs11   | Acyl-CoA synthetase long-chain family member 1                           | 0.6246                             | 1.4329             | 1.0274           |
| Acs14   | Acyl-CoA synthetase long-chain family member 4                           | 0.6648                             | 0.7214             | 1.5358           |
| Adipoq  | Adiponectin, C1Q and collagen domain containing                          | 0.8895                             | 0.8061             | 0.7679           |
| Adipor1 | Adiponectin receptor 1                                                   | 1.0951                             | 1.2133             | 1.3651           |
| Adipor2 | Adiponectin receptor 2                                                   | 1.1259                             | 0.9924             | 1.7041           |
| Akt3    | Thymoma viral proto-oncogene 3                                           | 1.4251                             | 1.3185             | 1.6575           |
| Alox5   | Arachidonate 5-lipoxygenase                                              | 1.2067                             | 1.6806             | 0.8403           |
| Apoe    | Apolipoprotein E                                                         | 1.3482                             | 1.5357             | 3.0504           |
| Casp1   | Caspase 1                                                                | 0.8895                             | 1.3745             | 1.3938           |
| Ccl12   | Chemokine (C-C motif) ligand 12                                          | 0.8128                             | 3.2692             | 6.676            |
| Ccr4    | Chemokine (C-C motif) receptor 4                                         | 0.8895                             | 0.8061             | 0.7679           |
| Ccr5    | Chemokine (C-C motif) receptor 5                                         | 0.9272                             | 1.463              | 2.4777           |
| Ccr6    | Chemokine (C-C motif) receptor 6                                         | 0.9666                             | 0.5355             | 0.7786           |
| Cd36    | CD36 antigen                                                             | 1.3765                             | 5.2742             | 12.9869          |
| Cd3e    | CD3 antigen, epsilon polypeptide                                         | 0.7584                             | 2.4098             | 1.2388           |
| Cebpa   | CCAAT/enhancer binding protein (C/EBP), alpha                            | 0.9208                             | 0.9454             | 0.6685           |
| Chuk    | Conserved helix-loop-helix ubiquitous kinase                             | 0.8532                             | 1.2561             | 1.2133           |
| Cnbp    | Cellular nucleic acid binding protein                                    | 1.2933                             | 1.1321             | 1.0785           |
| Crlf2   | Cytokine receptor-like factor 2                                          | 0.6075                             | 0.7732             | 1.2914           |
| Cs      | Citrate synthase                                                         | 1.6484                             | 1.0784             | 2.7683           |
| Cxcr3   | Chemokine (C-X-C motif) receptor 3                                       | 0.9599                             | 0.9259             | 1.14             |
| Cxcr4   | Chemokine (C-X-C motif) receptor 4                                       | 0.8957                             | 1.7159             | 3.9422           |
| Emr1    | EGF-like module containing, mucin-like, hormone receptor-like sequence 1 | 0.8473                             | 1.463              | 1.4938           |
| Fabp4   | Fatty acid binding protein 4, adipocyte                                  | 1.2843                             | 2.7874             | 8.4502           |
| Fasn    | Fatty acid synthase                                                      | 2.2054                             | 1.3094             | 2.0548           |
| Gys1    | Glycogen synthase 1, muscle                                              | 0.7584                             | 0.6067             | 1.5252           |

|        |                                                                                     |        |        |        |
|--------|-------------------------------------------------------------------------------------|--------|--------|--------|
| Hk2    | Hexokinase 2                                                                        | 0.7532 | 1.3094 | 3.2921 |
| Ifng   | Interferon gamma                                                                    | 1.0651 | 1.1399 | 0.9195 |
| Igf1   | Insulin-like growth factor 1                                                        | 0.9938 | 0.8944 | 1.0062 |
| Igf1r  | Insulin-like growth factor I receptor                                               | 1.4856 | 1.8777 | 2.4099 |
| Ikbkb  | Inhibitor of kappaB kinase beta                                                     | 0.9938 | 0.9586 | 1.1088 |
| Il18r1 | Interleukin 18 receptor 1                                                           | 0.9599 | 1.3094 | 0.852  |
| Il1b   | Interleukin 1 beta                                                                  | 0.7428 | 0.9719 | 3.0293 |
| Il1r1  | Interleukin 1 receptor, type I                                                      | 0.8415 | 0.9323 | 2.5651 |
| Il23r  | Interleukin 23 receptor                                                             | 0.8895 | 0.8061 | 0.7679 |
| Il6    | Interleukin 6                                                                       | 0.8895 | 0.8061 | 0.9993 |
| Insr   | Insulin receptor                                                                    | 1.3023 | 1.1479 | 1.2737 |
| Irs1   | Insulin receptor substrate 1                                                        | 1.6033 | 0.8944 | 0.9454 |
| Irs2   | Insulin receptor substrate 2                                                        | 1.0725 | 0.6731 | 0.4996 |
| Jak2   | Janus kinase 2                                                                      | 1.2067 | 1.1479 | 1.5358 |
| Lep    | Leptin                                                                              | 0.8895 | 0.8061 | 0.7679 |
| Lepr   | Leptin receptor                                                                     | 1.3389 | 1.8907 | 2.0548 |
| Lipe   | Lipase, hormone sensitive                                                           | 0.629  | 1.4034 | 1.2825 |
| Lpl    | Lipoprotein lipase                                                                  | 0.7027 | 3.6526 | 4.1959 |
| Lta4h  | Leukotriene A4 hydrolase                                                            | 1.0875 | 1.0345 | 1.2388 |
| Map2k1 | Mitogen-activated protein kinase kinase 1                                           | 1.1656 | 1.0062 | 1.3746 |
| Mapk3  | Mitogen-activated protein kinase 3                                                  | 1.0505 | 1.1088 | 1.071  |
| Mapk9  | Mitogen-activated protein kinase 9                                                  | 1.3482 | 1.3841 | 1.3746 |
| Mtor   | Mechanistic target of rapamycin (serine/threonine kinase)                           | 1.0951 | 1.2133 | 1.5358 |
| Nampt  | Nicotinamide phosphoribosyltransferase                                              | 1.0432 | 1.2914 | 1.8264 |
| Nfkbia | Nuclear factor of kappa light polypeptide gene enhancer in B-cells inhibitor, alpha | 0.8772 | 0.8403 | 1.2475 |
| Nlrp3  | NLR family, pyrin domain containing 3                                               | 1.0875 | 2.0264 | 2.8264 |
| Olr1   | Oxidized low density lipoprotein (lectin-like) receptor 1                           | 0.8895 | 1.1321 | 4.4352 |
| Pck1   | Phosphoenolpyruvate carboxykinase 1, cytosolic                                      | 0.7225 | 0.3229 | 0.6281 |
| Pde3b  | Phosphodiesterase 3B, cGMP-inhibited                                                | 1.3482 | 0.9069 | 1.337  |
| Pdk2   | Pyruvate dehydrogenase kinase, isoenzyme 2                                          | 1.3861 | 0.8061 | 1.4231 |
| Pdx1   | Pancreatic and duodenal homeobox 1                                                  | 0.8895 | 0.8061 | 0.7679 |
| Pik3ca | Phosphatidylinositol 3-kinase, catalytic, alpha polypeptide                         | 1.3113 | 1.0417 | 1.4631 |
| Pik3r1 | Phosphatidylinositol 3-kinase, regulatory subunit, polypeptide 1 (p85               | 1.1656 | 1.6346 | 2.0265 |

|                                         |                                                                         |                   |                   |                   |
|-----------------------------------------|-------------------------------------------------------------------------|-------------------|-------------------|-------------------|
|                                         | alpha)                                                                  |                   |                   |                   |
| Ppara                                   | Peroxisome proliferator activated receptor alpha                        | 1.3204            | 1.7159            | 2.0691            |
| Pparg                                   | Peroxisome proliferator activated receptor gamma                        | 1.0725            | 2.6371            | 3.7038            |
| Ppargc1a                                | Peroxisome proliferative activated receptor, gamma, coactivator 1 alpha | 1.4054            | 1.1883            | 0.8061            |
| Ptpn1                                   | Protein tyrosine phosphatase, non-receptor type 1                       | 0.54              | 0.7017            | 1.7159            |
| Pycard                                  | PYD and CARD domain containing                                          | 0.7428            | 1.2302            | 1.3841            |
| Rbp4                                    | Retinol binding protein 4, plasma                                       | 0.9337            | 0.9195            | 0.9006            |
| Rela                                    | V-rel reticuloendotheliosis viral oncogene homolog A (avian)            | 0.9145            | 0.8944            | 1.9439            |
| Retn                                    | Resistin                                                                | 0.8895            | 0.8061            | 0.7679            |
| Rps6kb1                                 | Ribosomal protein S6 kinase, polypeptide 1                              | 0.9467            | 0.9586            | 1.0203            |
| Scd1                                    | Stearoyl-Coenzyme A desaturase 1                                        | 4.9969            | 9.9793            | 13.0773           |
| Serpine1                                | Serine (or cysteine) peptidase inhibitor, clade E, member 1             | 1.5922            | 5.4602            | 30.2526           |
| Slc27a1                                 | Solute carrier family 27 (fatty acid transporter), member 1             | 0.8532            | 1.2388            | 1.1088            |
| Slc2a4                                  | Solute carrier family 2 (facilitated glucose transporter), member 4     | 1.683             | 4.3438            | 1.4732            |
| Socs3                                   | Suppressor of cytokine signaling 3                                      | 2.2362            | 0.9719            | 2.4436            |
| Srebf1                                  | Sterol regulatory element binding transcription factor 1                | 1.1901            | 3.942             | 2.8069            |
| Srebf2                                  | Sterol regulatory element binding factor 2                              | 1.2667            | 0.6593            | 0.9389            |
| Stat3                                   | Signal transducer and activator of transcription 3                      | 0.7532            | 0.6547            | 1.2561            |
| Tlr4                                    | Toll-like receptor 4                                                    | 1.0505            | 1.8518            | 1.669             |
| Tnf                                     | Tumor necrosis factor                                                   | 0.8895            | 2.6008            | 3.315             |
| Tnfrsf1a                                | Tumor necrosis factor receptor superfamily, member 1a                   | 0.6246            | 0.8117            | 1.6234            |
| Tnfrsf1b                                | Tumor necrosis factor receptor superfamily, member 1b                   | 1.0505            | 1.0859            | 1.7888            |
| Ucp1                                    | Uncoupling protein 1 (mitochondrial, proton carrier)                    | 0.8895            | 0.8061            | 0.7679            |
| Vldlr                                   | Very low density lipoprotein receptor                                   | 6.0672            | 7.155             | 12.6318           |
| <b>Control Genes for Normalization:</b> |                                                                         | <b>Average Ct</b> | <b>Average Ct</b> | <b>Average Ct</b> |
| Actb                                    | Actin, beta                                                             | 22.57             | 22.01             | 21.5              |
| B2m                                     | Beta-2 microglobulin                                                    | 19.52             | 19.13             | 18.92             |
| Gapdh                                   | Glyceraldehyde-3-phosphate                                              | 23.37             | 23.42             | 22.79             |

|                               |                                                              |       |       |       |
|-------------------------------|--------------------------------------------------------------|-------|-------|-------|
|                               | dehydrogenase                                                |       |       |       |
| Gusb                          | Glucuronidase, beta                                          | 28.04 | 27.64 | 27.05 |
| Hsp90ab1                      | Heat shock protein 90 alpha<br>(cytosolic), class B member 1 | 23.6  | 23.02 | 22.61 |
| <b>Experimental Controls:</b> |                                                              |       |       |       |
| MGDC                          | Mouse Genomic DNA Contamination                              | 35    | 35    | 35    |
| RTC                           | Reverse Transcription Control                                | 23.96 | 23.75 | 23.91 |
| RTC                           | Reverse Transcription Control                                | 23.99 | 23.75 | 23.92 |
| RTC                           | Reverse Transcription Control                                | 24.06 | 23.67 | 23.93 |
| PPC                           | Positive PCR Control                                         | 21.26 | 20.91 | 21.17 |
| PPC                           | Positive PCR Control                                         | 21.2  | 20.79 | 21.04 |
| PPC                           | Positive PCR Control                                         | 21.3  | 21.79 | 21.14 |

Table2: Primer Pairs for Real Time PCR Analysis of Gene Expression

| Name           | Forward Sequence           | Reverse Sequence            |
|----------------|----------------------------|-----------------------------|
| 18S            | ACGGAAGGGCACCACCAGGA       | CACCACCACCCACGGAATCG        |
| $\alpha$ SMA   | GTCCCAGACATCAGGGAGTAA      | TCGGATACTTCAGCGTCAGGA       |
| Col1A1         | ATGTTTACAGCTTTGTGGACCTC    | CAGAAAGCACAGCACTCGC         |
| F4/80          | CCCCAGTGTCTTACAGAGTG       | GTGCCCAGAGTGGATGTC T        |
| Fabp4          | AAGGTGAAGAGCATCATAACCC     | TCACGCCTTTCATAACACATTCC     |
| Fas            | AGCGGCCATTTCCATTGCCC       | CCATGCCCAGAGGGTGGTTG        |
| IL1beta        | ATGGCAACTGTTCTGAACTCAACT   | CAGGACAGGTATAGATTCTTTCCTTT  |
| IL6            | TAGTCCTTCTACCCCAATTTCC     | TTGGTCCTTAGCCACTCCTTC       |
| MCP-1          | AGGTCCCTGTCATGCTTCTG       | TCTGGACCCATTCTTCTTG         |
| Mgat           | TGGTGCCAGTTTGGTTCCAG       | TGCTCTGAGGTCGGGTTCA         |
| MMP9           | GCGCCACCACAGCCAACATG       | TGGATGCCGTCTATGTCGTCTTA     |
| MMP13          | CTTCTTCTTGTGAGCTGGACTC     | CTGTGGAGGTCAGTGTAGACT       |
| Pck1           | CGCTGGATGTCGGAAGAG         | AGTCTGTCAGTTCAATACCAATC     |
| Ppar- $\alpha$ | AGAGCCCCATCTGTCCTCTC       | ACTGGTAGTCTGCAAACCAAA       |
| Ppar- $\gamma$ | TCGCTGATGCACTGCCTATG       | GAGAGGTCCACAGAGCTGATT       |
| Srebp-1c       | AAC GTC ACT TCC AGC TAG AC | CCA CTA AGG TGC CTA CAG AGC |
| TNF $\alpha$   | CCCTCACACTCAGATCATCTTCT    | GCTACGACGTGGGCTACAG         |

# Supplemental Figure 1

## A

H + E

C57BL/6

RIP3<sup>-/-</sup>

Chow

HFD

Chow

HFD

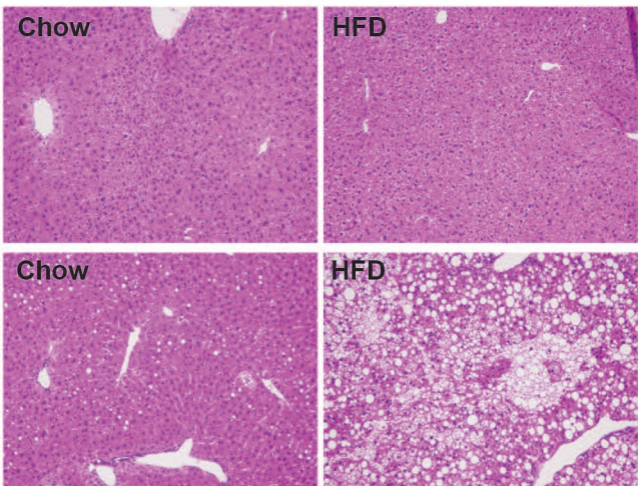

## B

Oil Red O

C57BL/6

RIP3<sup>-/-</sup>

Chow

Chow

HFD

HFD

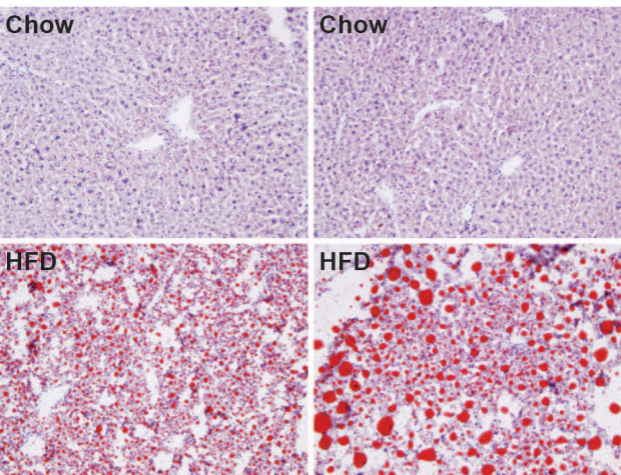

# Supplemental Figure 2

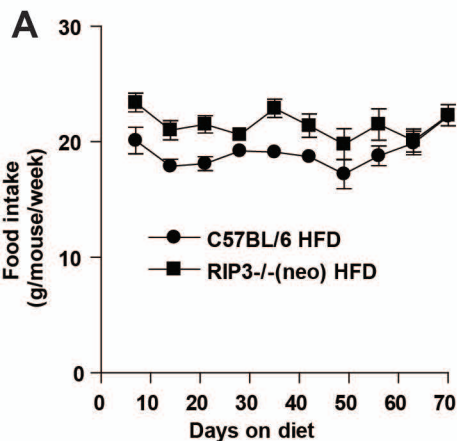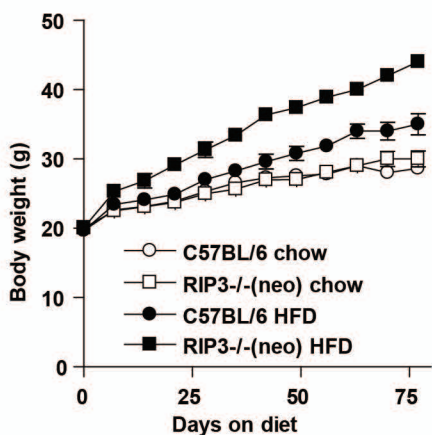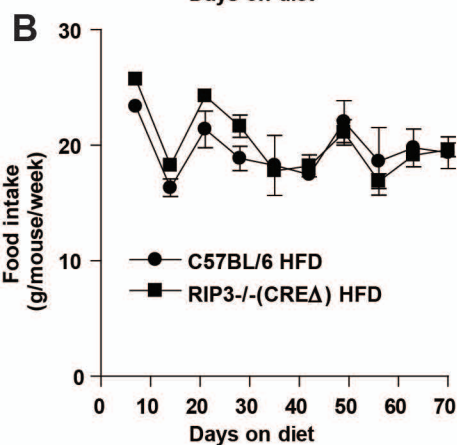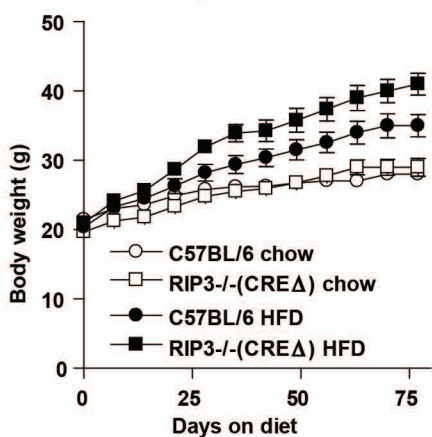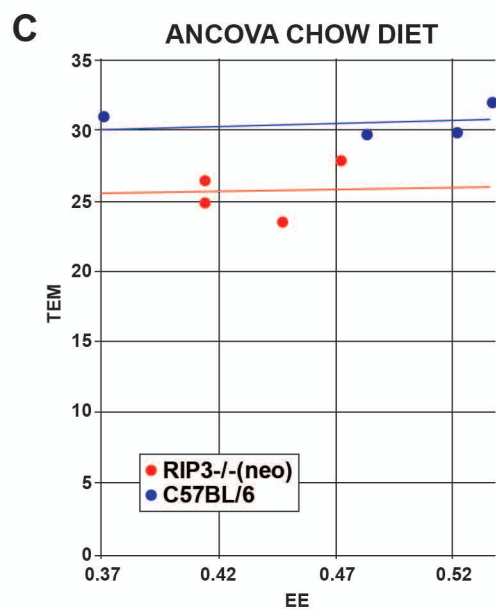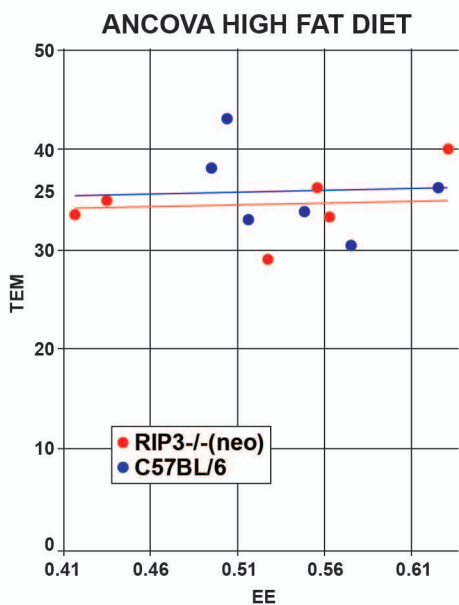

# Supplemental Figure 3

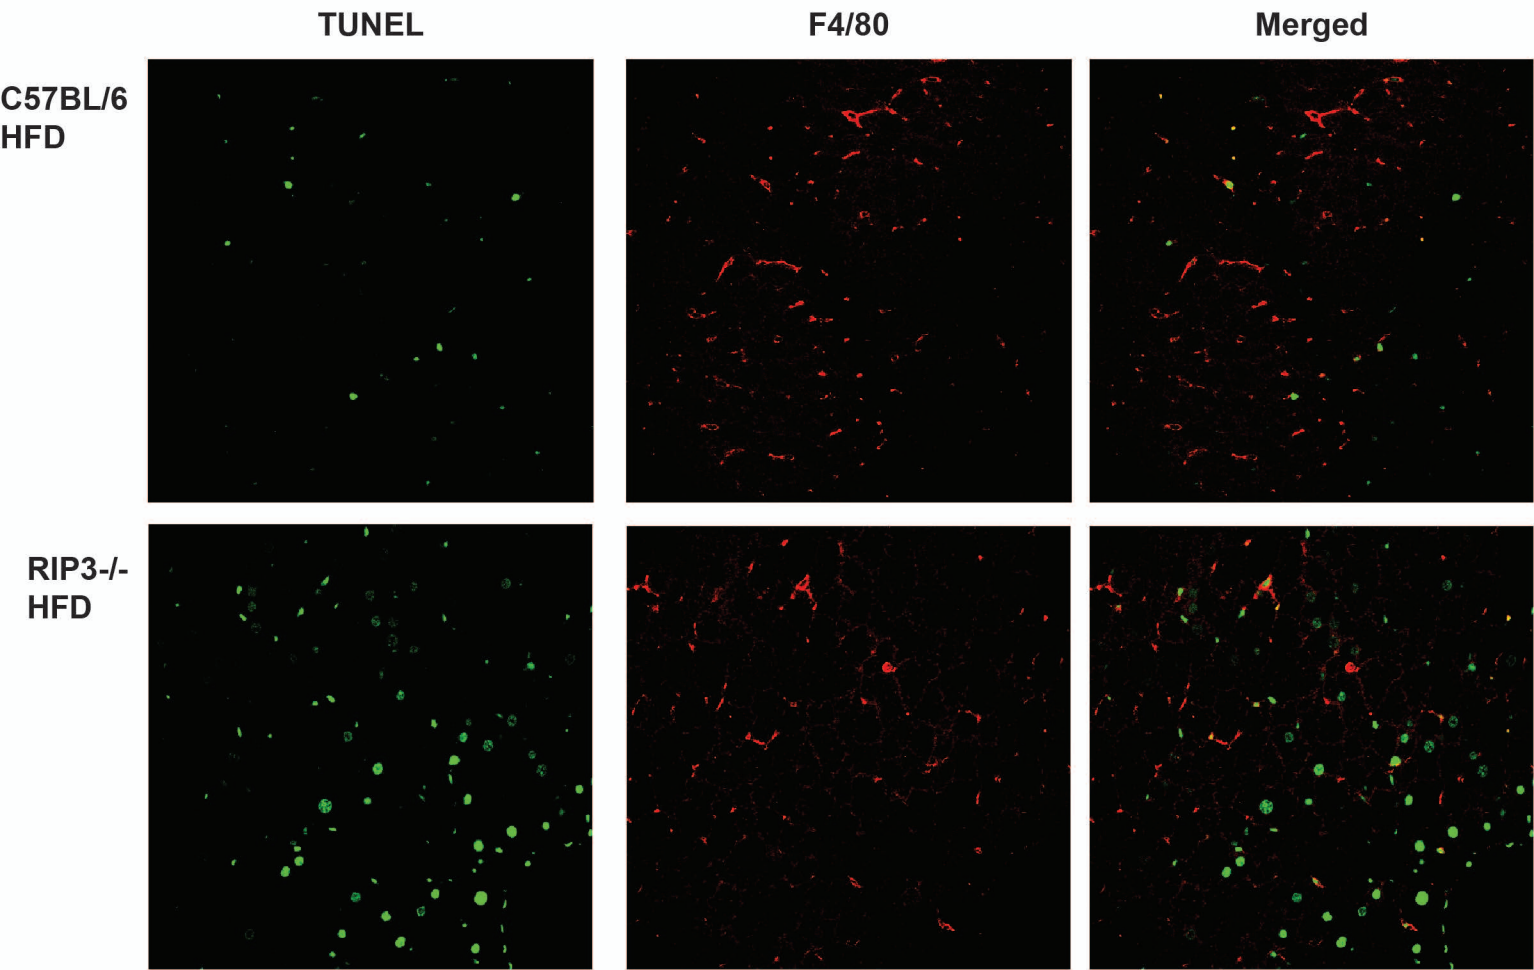



# Supplemental Figure 4

RIP3

---

Scrambled siRNA

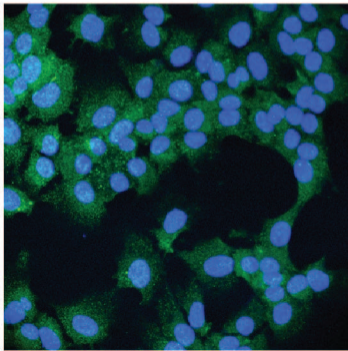

RIP3 siRNA

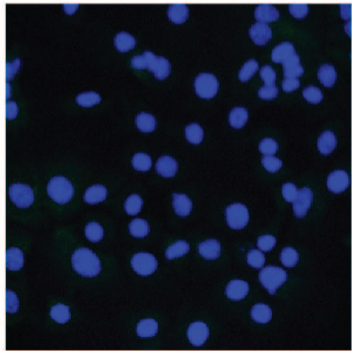

# Supplemental Figure 5

A

Sirius red (10x)

C57BL/6

RIP3<sup>-/-</sup>

Chow

Chow

HFD

HFD

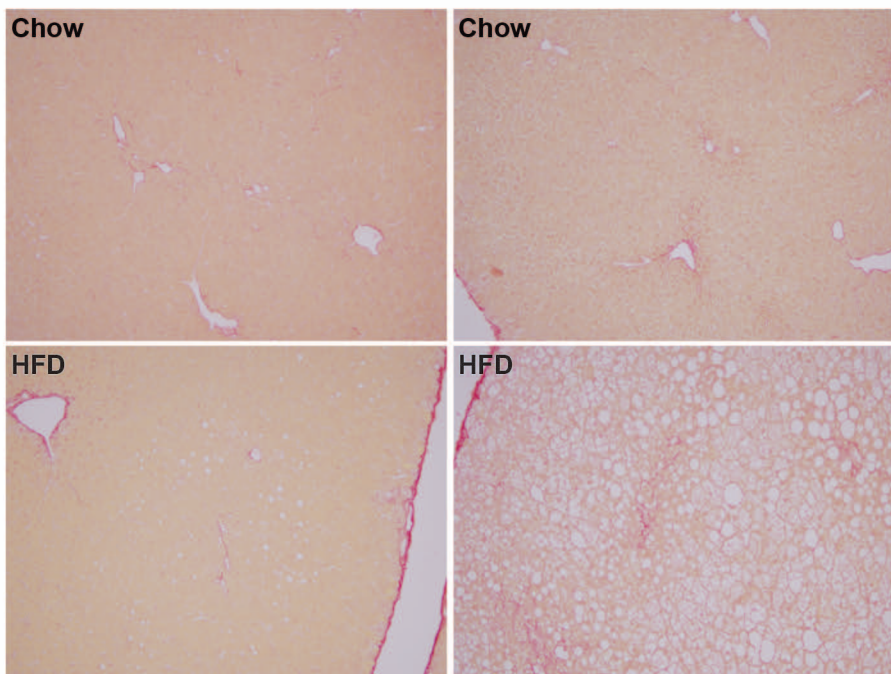

B

Collagen 1 (20x)

C57BL/6

RIP3<sup>-/-</sup>

Chow

Chow

HFD

HFD

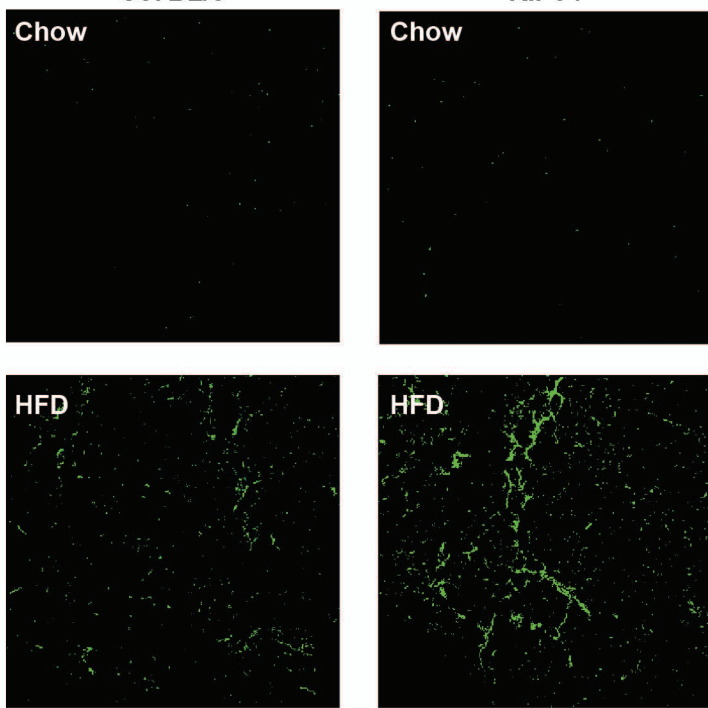

Supplement: NIHMS795894-supplement-Supp_Info.pdf [file NIHMS795894-supplement-Supp_Info.pdf]
